# Supplementary material
Source: PubMed Central journal article supplement (PMC3416364)
Supplement: supp_78.14.4874_AEM07724-11_supplemental.pdf [file supp_78.14.4874_AEM07724-11_supplemental.pdf]

## Supplemental material

TABLE S1. Primers used to sequence the *arc* operon of *Lactobacillus sakei* CTC 494, designed based on the genome sequence of *Lactobacillus sakei* 23K.

| PCR target <sup>a</sup> | Forward primer (5' → 3')  | Reverse primer (5' → 3') | Amplicon length (bp) |
|-------------------------|---------------------------|--------------------------|----------------------|
| 372,772-373,556         | AATTAAGGATGATACGATTGTTG   | GCAGCGAGGTTTTCTAAGTA     | 785                  |
| 373,430-374,238         | ACATTATGTATCGTTTATTGTTTG  | TAAGATAAGTGTCAACCATGC    | 809                  |
| 374,082-374,883         | TAACCACAGTGGCTTTGAA       | GCTGTATCTTCAACTGATTCTT   | 802                  |
| 374,762-375,552         | AAAAATTCAACCAGAACG        | ATTCTGTTTTTCAGCTTCTTC    | 791                  |
| 375,430-376,238         | TGATATTGAAACTGAATATGGTAAG | GGTGCTTCTTGAATACCAAT     | 809                  |
| 376,106-376,900         | GACCTTCTATAGCGAAGCA       | ACCGTTTGATACAATTCATAAC   | 795                  |
| 376,758-377,564         | ATGACCATGTCAGAATTGATG     | ATCAACGAGTGGTTCTTGTG     | 807                  |
| 377,434-378,242         | GTGTTTTTCAGTGATCAGTTAGC   | ATATGTTAAGCTCCACGATAAAA  | 809                  |
| 378,098-378,895         | TTATTGGTTGTCAGCATGG       | AAGTTATAAGCTTTCGTTGTGAA  | 798                  |
| 378,767-379,573         | AAATTTATTGCCAGCTTACTTC    | AGCTAAGTTTGCTTGATATACG   | 807                  |
| 379,434-380,240         | TTCATAAGGGCCAGGAAT        | ACTGTCAGTATGAAGAGGATCAC  | 807                  |

<sup>a</sup>Position in the genome of *Lactobacillus sakei* 23K

TABLE S2. Primers used for RT-qPCR analysis of target (*arc* operon) and reference genes of *Lactobacillus sakei* CTC 494.

| Gene                   | Forward primer (5' → 3')  | Reverse primer (5' → 3')    | Amplicon length (bp) |
|------------------------|---------------------------|-----------------------------|----------------------|
| <b>Target genes</b>    |                           |                             |                      |
| <i>arcA</i>            | TCTATATGGATCCAATGCCTAACCT | GTTAAGCCATCCCCATTGA         | 70                   |
| <i>arcB</i>            | AACAGGTTCAATGTTAGGCGTAAAT | TCAGCTAAATCACGGACTTCTTGT    | 84                   |
| <i>arcC</i>            | AGCTTTCCAAAACCCAACGA      | TGGGTTGATACTTTGTTGTTTCTTAGC | 79                   |
| <i>arcD</i>            | GAAGGGATTTTCTCTTACGCTGAA  | AACCATGCTGACAACCAATAACC     | 86                   |
| <i>arcT</i>            | CAAGCAGTTTTAGCCCGTAA      | GCAACCCACGCTTTAAAAATCT      | 69                   |
| <i>arcR</i>            | GGTGAAGGAATTAGCGACAATGA   | TTTTGGGCAACCAACTGTTTAA      | 73                   |
| <b>Reference genes</b> |                           |                             |                      |
| <i>secY</i>            | GTTAGGGAATGGTGTTTCAATGATT | GATGATTTGATGAAGGCCACTTG     | 54                   |
| <i>rpoB</i>            | AACCAATTCCGTATIGGTTT      | CCGTCCCAAGTCATGAAAC         | 65                   |
| <i>recA</i>            | CGAAGCGTCGGAGTAGGT        | AGCATGTAACGCAACGGTTGT       | 74                   |
| <i>pfk</i>             | GCAACCCCGCCTTTGC          | AGCTAGCCGCTTAGGCTCAA        | 60                   |
| <i>fusA</i>            | AACCCAAACGTCACCATATTGAC   | GCATCTGCACAAGGTAAATTCG      | 66                   |
| <i>ileS</i>            | CAGCCCGCCACCCATTA         | ATGTCACGTGGTTCCCTAAGATC     | 60                   |
| <i>pcrA</i>            | CCCCGTTTAGGGCTGTTGA       | TGGTTAATGCGGCCGATT          | 58                   |

TABLE S3. Primers used for RT-qPCR analysis of target (*arc* operon and putative second *arc* operon) and reference genes of *Lactobacillus sakei* 23K.

| Gene                                     | Forward primer (5' → 3')  | Reverse primer (5' → 3')    | Amplicon length (bp) |
|------------------------------------------|---------------------------|-----------------------------|----------------------|
| <b>Target genes</b>                      |                           |                             |                      |
| <b><i>arc</i> operon</b>                 |                           |                             |                      |
| <i>arcA</i>                              | TCTATATGGATCCAATGCCTAACCT | GTTAAGCCATCCCCCATTGA        | 70                   |
| <i>arcB</i>                              | AACAGGTTCAATGTTAGGCGTAAAT | TCAGCTAAATCACGGACTTCTTGT    | 84                   |
| <i>arcC</i>                              | AGCTTTCCAAAACCCAACGA      | TGGGTTGATACTTTGTTGTTTCTTAGC | 79                   |
| <i>arcD</i>                              | GAAGGGATTTTCTCTTACGCTGAA  | AACCATGCTGACAACCAATAACC     | 86                   |
| <i>arcT</i>                              | CAAGCAGGTTTTAGCCCGTAA     | GCAACCCACGCTTTAAAAATCT      | 69                   |
| <i>arcR</i>                              | GGTGAAGGAATTAGCGACAATGA   | TTTTGGGCAACCAACTGTTTAA      | 78                   |
| <b>Putative second <i>arc</i> operon</b> |                           |                             |                      |
| <i>LSA0067</i>                           | AGATGGGCATGCAATTCGTT      | ATTCTTTTGACCGATTGCTAATGTT   | 80                   |
| <i>LSA0068</i>                           | GCAAATTCCCAAGCCATTA       | CATCCCGAAAGCTGCGAATA        | 73                   |
| <i>LSA0069</i>                           | TTAAACGACATTATCGCAACGATT  | AGAAGAATGCCAGAAAATATTGG     | 79                   |
| <i>LSA0070</i>                           | CTAAACCAGCGCAAGCAACTT     | GCCAACGGTCACACTTTCAA        | 71                   |
| <i>LSA0071</i>                           | GTGACGCAAACCATTGTAGCA     | TCTTCATAAAAAGGACCGATTGG     | 77                   |
| <i>LSA0072</i>                           | CCAATGTTTGCGACTCAAGAAG    | CCTGGATAGCGAGGCAAGAG        | 71                   |
| <b>Reference genes</b>                   |                           |                             |                      |
| <i>fusA</i>                              | AACCCAAACGTCACCATATTGAC   | GCATCTGCACAAGGTAAATTCG      | 66                   |
| <i>ileS</i>                              | CAGCCCGCCACCCATTA         | ATGTCACGTGGTTCCCTAAGATC     | 60                   |
| <i>pcrA</i>                              | CCCCGTTTAGGGCTGTTGA       | TGGTTAATGCGGCCGATT          | 58                   |

TABLE S4. Optimized concentrations and amplification efficiencies (calculated with the DART-PCR applet) of the primers used to calculate the relative expression of the target (*arc* operon) and reference genes for *Lactobacillus sakei* CTC 494. Amplification efficiencies, with the corresponding standard deviations, are mean efficiencies for the late-exponential, end-exponential, early-stationary, and late-stationary growth phase time points of all fermentations performed in quadruplicate.

| Gene                   | Concentration (nM) |                | Amplification efficiency |
|------------------------|--------------------|----------------|--------------------------|
|                        | Forward primer     | Reverse primer |                          |
| <b>Target genes</b>    |                    |                |                          |
| <i>arcA</i>            | 300                | 300            | 1.98 ± 0.02              |
| <i>arcB</i>            | 300                | 300            | 1.91 ± 0.01              |
| <i>arcC</i>            | 300                | 300            | 1.95 ± 0.02              |
| <i>arcD</i>            | 300                | 300            | 1.90 ± 0.01              |
| <i>arcT</i>            | 300                | 300            | 1.93 ± 0.02              |
| <i>arcR</i>            | 300                | 300            | 1.92 ± 0.08              |
| <b>Reference genes</b> |                    |                |                          |
| <i>fusA</i>            | 500                | 500            | 1.88 ± 0.03              |
| <i>ileS</i>            | 500                | 500            | 1.92 ± 0.02              |
| <i>pcrA</i>            | 500                | 500            | 1.89 ± 0.03              |

TABLE S5. Optimized concentrations and amplification efficiencies (calculated with the DART-PCR applet) of the primers used to calculate the relative expression of the target genes (*arc* operon and a putative second *arc* operon) and reference genes for *Lactobacillus sakei* 23K. Amplification efficiencies, with the corresponding standard deviations, are mean efficiencies for the late-exponential, end-exponential, early-stationary, and late-stationary growth phase time points of all fermentations performed in quadruplicate.

| Gene                              | Concentration (nM) |                | Amplification efficiency |
|-----------------------------------|--------------------|----------------|--------------------------|
|                                   | Forward primer     | Reverse primer |                          |
| <b>Target genes</b>               |                    |                |                          |
| <i>arc operon</i>                 |                    |                |                          |
| <i>arcA</i>                       | 300                | 300            | 2.00 ± 0.01              |
| <i>arcB</i>                       | 300                | 300            | 1.97 ± 0.01              |
| <i>arcC</i>                       | 300                | 300            | 1.98 ± 0.00              |
| <i>arcD</i>                       | 300                | 300            | 1.94 ± 0.01              |
| <i>arcT</i>                       | 300                | 300            | 1.94 ± 0.01              |
| <i>arcR</i>                       | 300                | 300            | 1.94 ± 0.07              |
| <i>Putative second arc operon</i> |                    |                |                          |
| <i>LSA0067</i>                    | 300                | 300            | 1.95 ± 0.01              |
| <i>LSA0068</i>                    | 300                | 300            | 1.93 ± 0.01              |
| <i>LSA0069</i>                    | 300                | 300            | 1.98 ± 0.02              |
| <i>LSA0070</i>                    | 300                | 300            | 1.97 ± 0.01              |
| <i>LSA0071</i>                    | 300                | 300            | 1.97 ± 0.01              |
| <i>LSA0072</i>                    | 300                | 300            | 1.90 ± 0.03              |
| <b>Reference genes</b>            |                    |                |                          |
| <i>fusA</i>                       | 500                | 500            | 1.87 ± 0.07              |
| <i>ileS</i>                       | 500                | 500            | 1.95 ± 0.02              |

TABLE S6. Primers used to screen for a putative second *arc* operon in *Lactobacillus sakei*, which were designed based on the genome sequence of *Lactobacillus sakei* 23K.

| PCR target <sup>a</sup> | Forward primer (5' → 3') | Reverse primer (5' → 3') | Amplicon length (bp) |
|-------------------------|--------------------------|--------------------------|----------------------|
| 63,638-64,312           | TTTTGTGTATTACTAAAATGGTG  | ACATTAATGAAACACAGACTTG   | 675                  |
| 64,202-64,910           | AAATCGGCGATATCATCA       | GACATTAATACGGCATCAAATA   | 709                  |
| 64,776-65,483           | AGATCCAGCATTAAAAGACTTA   | ACCACTTCAAAACCTAAGAAG    | 708                  |
| 65,349-66,045           | ACTTGGTATTTACCATGCTG     | GGATAACCACTGCATTACC      | 697                  |
| 65,957-66,663           | GTTGATGTTCCCATCATTT      | TTCACAAACCTTTTGAGC       | 707                  |
| 66,544-67,253           | GTTAATGATAAAGGCGACAG     | CGATCTGGATATAATTTTTGA    | 710                  |
| 67,124-67,818           | TAGCAGGAGATCGATTAGC      | GGCATCTTCCATCATTTG       | 695                  |
| 67,718-68,425           | CATTTACCAACCCACTA        | CTGGTAAATAGTATTGGTCCTC   | 708                  |
| 68,292-69,001           | GTTTTCAAAGAAGCGACTA      | AATAACCTAGTTTTAACCAAATC  | 710                  |
| 68,886-69,571           | CGAGGAATCTATTCTTTCTG     | CATCCATATTTTTAATGACGTA   | 686                  |

<sup>a</sup>Position in the genome of *Lactobacillus sakei* 23K

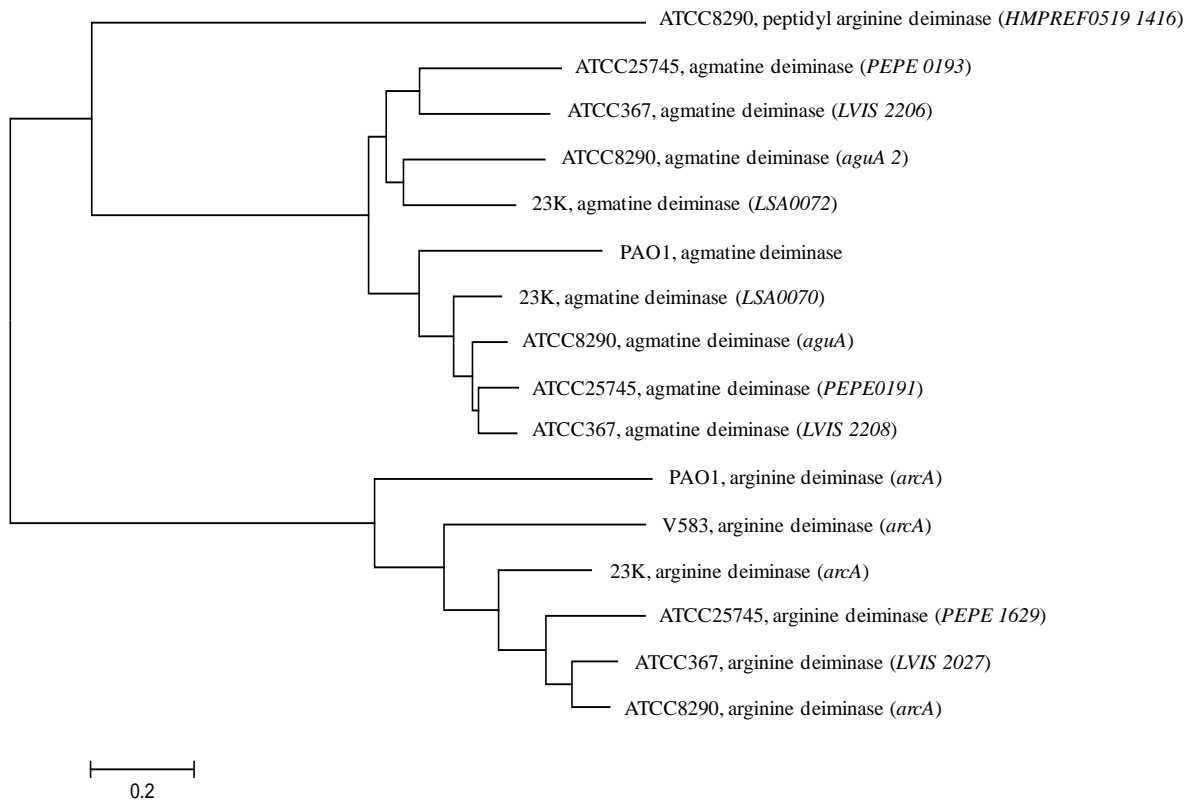

FIG. S1. Clustering trees of arginine and agmatine deiminases based on their amino acid sequences, for *Pseudomonas aeruginosa* PAO1, LASB58, UCBPP-PA14, and PA7; *Enterococcus faecalis* 62, V583, and ATCC 4200; *L. sakei* 23K; *Lactobacillus hilgardii* ATCC 8290; *Lactobacillus brevis* ATCC 367; and *Pediococcus pentosaceus* ATCC 25745, applying MEGA 4.0 and using the neighbor-joining clustering method.

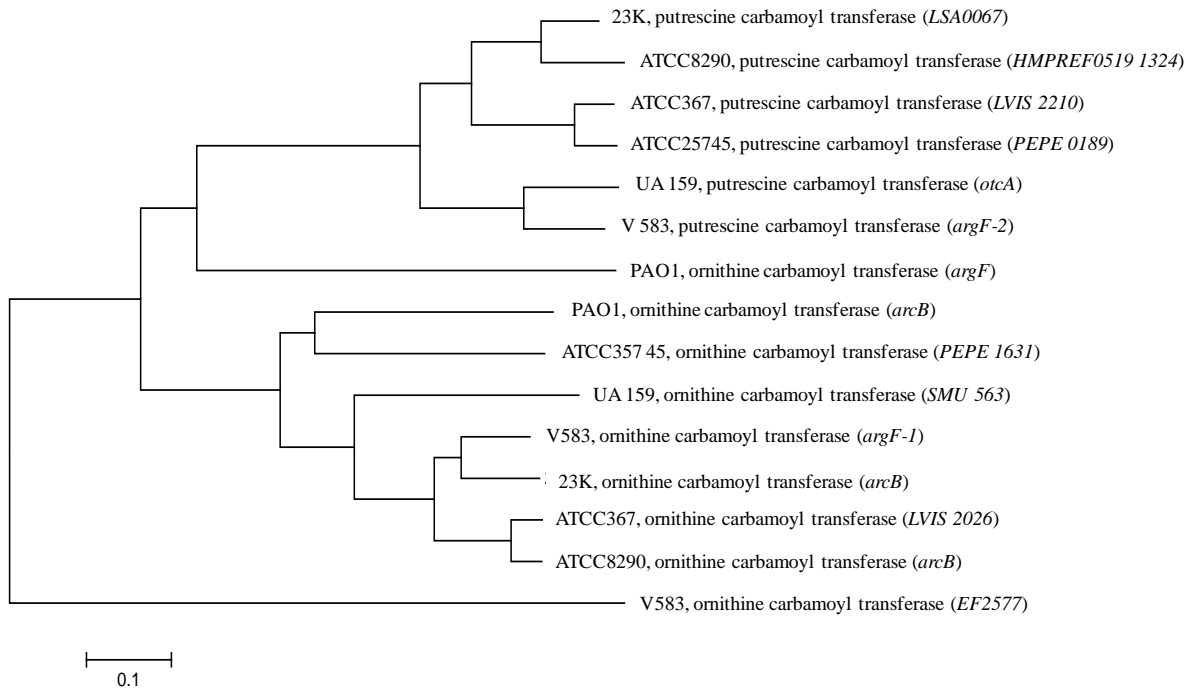

FIG. S2. Clustering trees of ornithine and putrescine carbamoyl transferases based on their amino acid sequences, for *Pseudomonas aeruginosa* PAO1, LASB58, UCBPP-PA14, and PA7; *Enterococcus faecalis* 62, V583, and ATCC 4200; *L. sakei* 23K; *Lactobacillus hilgardii* ATCC 8290; *Lactobacillus brevis* ATCC 367; and *Pediococcus pentosaceus* ATCC 25745, applying MEGA 4.0 and using the neighbor-joining clustering method.
